# TABLE OF CONTENTS

# ANESTHESIOLOGY

Volume 134

Issue 3

March 2021

◇ **This Month in ANESTHESIOLOGY** ..... 1A  
**Science, Medicine, and the Anesthesiologist**..... 15A  
**Infographics in Anesthesiology** ..... 19A

◆ **Editorials**

**Known and Unknown Unknowns in Making Erythrocyte Transfusion Decisions**

*R. B. Weiskopf, R. J. Cook*.....359

**Personalization over Protocolization: Embracing Diversity of Pain Trajectories after Surgery**

*K. L. Schreiber, J. D. Muehlschlegel* .....363

**COVID-19–associated Coagulopathy: Less Fibrinolysis Can Be More Harmful!**

*K. Görlinger, J. H. Levy*.....366

**Perioperative Medicine**

**CLINICAL SCIENCE**

◆ ◇ **Restrictive Transfusion Strategy after Cardiac Surgery: Role of Central Venous Oxygen Saturation Trigger: A Randomized Controlled Trial**  
*N. Zeroual, C. Blin, M. Saour, H. David, S. Aouinti, M.-C. Picot, P. H. Colson, P. Gaudard*.....370

A restrictive transfusion strategy using a central SvO<sub>2</sub> endpoint also reduces allogeneic erythrocyte transfusion. Using a mixed venous physiologic criterion rather than a hemoglobin target for erythrocyte transfusion represents an improved clinically relevant transfusion trigger for future clinical trials.

◆ ◇ **Intravenous versus Volatile Anesthetic Effects on Postoperative Cognition in Elderly Patients Undergoing Laparoscopic Abdominal Surgery: A Multicenter, Randomized Trial**  
*Y. Li, D. Chen, H. Wang, Z. Wang, F. Song, H. Li, L. Ling, Z. Shen, C. Hu, J. Peng, W. Li, W. Xing, J. Pan, H. Liang, Q. Zhou, J. Cai, Z. He, S. Peng, W. Zeng, Z. Zuo* .....381

This prospective randomized study found no differences in neurocognitive disorder at postoperative days 5 to 7 between patients anesthetized with a propofol-based compared to a sevoflurane-based anesthetic. Elevated interleukin-6 concentrations 1 h after skin excision may be predictive of the development of a postoperative neurocognitive disorder on postoperative days 5 to 7. *SUPPLEMENTAL DIGITAL CONTENT IS AVAILABLE IN THE TEXT*

◇ Refers to This Month in ANESTHESIOLOGY

◆ Refers to Editorial

 This article has an Audio Podcast

 See Supplemental Digital Content

 CME Article

 This article has a Video Abstract

 Part of the Letheon writing competition

 This article has a Visual Abstract

 This article is Open Access

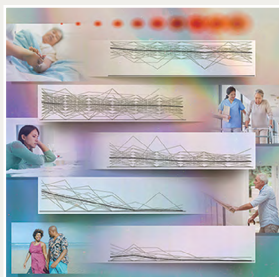

**ON THE COVER:** Gaining a better understanding of postoperative pain trajectories may impact acute postoperative suffering and lead to preventative therapies for persistent postsurgical pain. In this issue of ANESTHESIOLOGY, Vasilopoulos *et al.* evaluated patterns of acute postoperative pain in a mixed surgical patient cohort and found multiple distinct pain intensity trajectories. In an accompanying editorial, Schreiber and Muehlschlegel review the recent evolution of postoperative pain measurement and call for personalization of pain treatment to an individual's expected pain trajectory rather than the current protocolization based solely on the procedure being performed. Cover Illustration: A. Johnson, Vivo Visuals.

- Vasilopoulos *et al.*: Patient and Procedural Determinants of Postoperative Pain Trajectories, p. 421
- Schreiber and Muehlschlegel: Personalization over Protocolization: Embracing Diversity of Pain Trajectories after Surgery, p. 363

 **Bedside Allogeneic Erythrocyte Washing with a Cell Saver to Remove Cytokines, Chemokines, and Cell-derived Microvesicles: A Clinical Feasibility Study**

*I. J. Welsby, P. J. Norris, W. J. Mauermann, M. V. Podgoreanu, C. M. Conn, L. Meade, T. Cannon, S. M. Keating, C. C. Silliman, M. Kehler, P. J. Schulte, D. J. Kor*.....395

This study found that bedside point-of-care washing of allogeneic erythrocytes was feasible for 99% of elective cardiac surgical patients included in the study, with 93% of allogeneic erythrocyte units washed per study protocol. Biologic response modifiers were significantly decreased in supernatant after allogeneic bedside erythrocyte washing when compared with before washing. Cell-free hemoglobin was significantly increased after allogeneic erythrocyte washing when compared to before washing. Percent hemolysis was assessed in a five-unit subset of washed erythrocyte units and was less than 0.8%. Future reporting of the larger randomized control trial results will help to determine impact of these findings on clinical outcomes after cardiac surgery. Cell-free hemoglobin and percent hemolysis in washed cells should be further assessed in relation to clinical outcomes and findings should be validated in other cardiac surgical cohorts.

**BASIC SCIENCE**

 **Spinal Anesthesia Reduces Myocardial Ischemia–triggered Ventricular Arrhythmias by Suppressing Spinal Cord Neuronal Network Interactions in Pigs**

*Y. Omura, J. P. Kipke, S. Salavatian, A. S. Afjouni, C. Wooten, R. F. Herkenham, U. Maoz, E. Lashgari, E. A. Dale, K. Howard-Quijano, A. Mahajan* .....405

This study's experiments were done on pigs and showed that bupivacaine spinal anesthesia during myocardial ischemia decreases neuronal firing rate in the afferent dorsal horn and efferent intermediolateral nucleus, and reduces the network interactions among the dorsal horn neurons, as well as those between dorsal horn and intermediolateral nucleus neurons. This is associated with decreased ventricular arrhythmias.

**Pain Medicine**

**CLINICAL SCIENCE**

  **Patient and Procedural Determinants of Postoperative Pain Trajectories**

 *T. Vasilopoulos, R. Wardhan, P. Rashidi, R. B. Fillingim, M. R. Wallace, P. L. Crispen, H. K. Parvataneni, H. A. Prieto, T. N. Machuca, S. J. Hughes, G. J. A. Murad, P. J. Tighe, on behalf of the Temporal Postoperative Pain Signatures (TEMPOS) Group* .....421

Monitoring postoperative pain for 7 days in 360 patients recovering from surgery allowed the identification of five distinct pain trajectories. Patient-specific factors such as age, sex, and psychologic features were the predominant determinants of trajectory group membership. *SUPPLEMENTAL DIGITAL CONTENT IS AVAILABLE IN THE TEXT*

**BASIC SCIENCE**

  **Positive Regulatory Domain I-binding Factor 1 Mediates Peripheral Nerve Injury–induced Nociception in Mice by Repressing Kv4.3 Channel Expression**

*C. Wang, Y. Pan, W. Zhang, Y. Chen, C. Li, F. Zhao, T. Behnisch*.....435

After nerve injury in mice, the enhanced expression of the positive regulatory domain I-binding factor 1 (PRDM1) reduced the expression of the Kv4.3 potassium ion channel. The reduced expression of Kv4.3 caused nociceptive sensitization in male and female mice. Conversely, maneuvers that enhanced Kv4.3 expression reduced nociceptive sensitivity in mice, suggesting that this regulatory pathway may have central importance in pain after nerve injury. *SUPPLEMENTAL DIGITAL CONTENT IS AVAILABLE IN THE TEXT*

**Critical Care Medicine**

**CLINICAL SCIENCE**

  **Greater Fibrinolysis Resistance but No Greater Platelet Aggregation in Critically Ill COVID-19 Patients**

 *C. Heinz, W. Miesbach, E. Herrmann, M. Sonntagbauer, F. J. Raimann, K. Zacharowski, C. F. Weber, E. H. Adam* .....457

Despite increases in von Willebrand factor, platelet aggregability based on impedance aggregometry testing was not increased in critically ill COVID-19, although viscoelastometric testing noted fibrinolysis resistance. These findings contribute to our understanding of the hypercoagulable state of COVID-19 and may have important considerations for management strategies.

**Education**

**IMAGES IN ANESTHESIOLOGY**

**Suturing Gone Wrong: An Unintended Complication of Internal Jugular Venous Introducer Securement**

*L. K. Doney, D. J. Szoke, S. Khanna, J. M. Hargrave* .....468

**Done with Mirrors? A Line-of-Sight Problem in the Operating Room**

*T. N. Timmermann, Z. B. Deutch* .....469

**CLINICAL FOCUS REVIEW**

  **Perioperative Platelet Transfusions**

*A. S. Hess, J. Ramamoorthy, J. R. Hess* .....471

A brief review of the best evidence for when and how an anesthesiologist should administer platelets.

**REVIEW ARTICLE**

- ◇ **Stroke in Surgical Patients: A Narrative Review**  
*P. E. Visides, L. E. Moore* .....480

Stroke is a devastating perioperative complication. The objective of this narrative review is to provide an evidence-based update on perioperative stroke and to discuss future directions for the prevention, identification, and treatment of perioperative stroke.

**MIND TO MIND**

- Trance-it to the Future**  
*N. Ajayan, A. P. Hrishi*.....493
- Distant Vision**  
*J. M. Berry*.....498

**Correspondence**

- Pleth Variability Index in Orthopedic Surgery: Comment**  
*H. Kehlet, N. B. Foss*.....500
- Pleth Variability Index in Orthopedic Surgery: Comment**  
*S. Gelman* .....501
- Pleth Variability Index in Orthopedic Surgery: Reply**  
*M.-O. Fischer, C. Buléon, J.-L. Hanouz, for the Optimization using Pleth Variability Index Trial Group* .....502

- Postoperative Hypotension and Myocardial Injury: Comment**  
*D. Schulthess, M. Amrein, Noemi Glamer,  
P. Lopez-Ayala, C. Mueller* .....503

- Postoperative Hypotension and Myocardial Injury: Reply**  
*V. G. B. Liem, S. E. Hoeks, F. van Lier*.....504

- Anesthesia and Circulating Tumor Cells: Comment**  
*Y. Zhu, F. Wang, T. Zhu*.....506

- Anesthesia and Circulating Tumor Cells: Reply**  
*F. Hovaguimian, J. Braun, M. Schläpfer, M. A. Puhan,  
B. Beck-Schimmer*.....507

**Anesthesiology Reflections from the Wood Library-Museum**

- Softly Treading *Digitalis's* Timeline, Foxglove Has Fingers in Botany and Medicine**  
*Melissa L. Coleman and Jane S. Moon*..... 404
- Fallen from Grace, Ephedrine Finds Haven in Anesthesiology**  
*Jane S. Moon and Melissa L. Coleman*..... 420
- Shaker Anodyne: Teetotalers' Valerian Elixir**  
*Melissa L. Coleman and Jane S. Moon*..... 456

**Careers & Events ..... 21A**

**INSTRUCTIONS FOR AUTHORS**

The most recently updated version of the Instructions for Authors is available at [www.anesthesiology.org](http://www.anesthesiology.org). Please refer to the Instructions for the preparation of any material for submission to ANESTHESIOLOGY.

Manuscripts submitted for consideration for publication must be submitted in electronic format via Editorial Manager (<https://www.editorialmanager.com/aln>). Detailed directions for submission and the most recent version of the Instructions for Authors can be found on the Journal's Web site (<http://www.anesthesiology.org>). Books and educational materials for review should be sent to Alan Jay Schwartz, M.D., M.S.Ed., Director of Education, Department of Anesthesiology and Critical Care Medicine, The Children's Hospital of Philadelphia,

**ANESTHESIOLOGY** (ISSN 0003-3022) is published monthly by Wolters Kluwer Health, Inc., 14700 Citicorp Drive, Bldg 3, Hagerstown, MD 21742. Business office: Two Commerce Square, 2001 Market Street, Philadelphia, PA 19103. Periodicals postage paid at Hagerstown, MD, and at additional mailing offices. Copyright © 2021, the American Society of Anesthesiologists, Inc. All Rights Reserved.

**Annual Subscription Rates:** *United States*—\$1077 Individual, \$2671 Institution, \$434 In-training. *Rest of World*—\$1136 Individual, \$2965 Institution, \$434 In-training. Single copy rate \$266. Subscriptions outside of North America must add \$58 for airfreight delivery. Add state sales tax, where applicable. The GST tax of 7% must be added to all orders shipped to Canada (Wolters Kluwer Health, Inc.'s GST Identification #895524239, Publications Mail Agreement #1119672). Indicate in-training status and name of institution. Institution rates apply to libraries, hospitals, corporations, and partnerships of three or more individuals. Subscription prices outside the United States must be prepaid. Prices subject to change without notice. Subscriptions will begin with currently available issue unless otherwise requested. Visit us online at [www.lww.com](http://www.lww.com).

Individual and in-training subscription rates include print and access to the online version. Online-only subscriptions for individuals (\$356) and persons in training (\$356) are available to nonmembers and may be ordered by downloading a copy of the Online Subscription FAXback Form from the Web site, completing the information requested, and faxing the completed form to 301-223-2400. Institutional rates are for print only; online subscriptions are available via Ovid. Institutions can choose to purchase a print and online subscription together for a discounted rate. Institutions that wish to purchase a print subscription, please contact Wolters Kluwer Health, Inc.,

34th Street and Civic Center Blvd., Room 9327, Philadelphia, Pennsylvania 19104-4399. Article-specific permission requests are managed with Copyright Clearance Center's Rightslink service. Information can be accessed directly from articles on the journal Web site. More information is available at <http://anesthesiology.pubs.asahq.org/public/rightsandpermissions.aspx>. For questions about the Rightslink service, e-mail [customer-care@copyright.com](mailto:customer-care@copyright.com) or call 877-622-5543 (U.S. only) or 978-777-9929. Advertising and related correspondence should be addressed to Advertising Manager, ANESTHESIOLOGY, Wolters Kluwer Health, Inc., Two Commerce Square, 2001 Market Street, Philadelphia, Pennsylvania 19103 (Web site: <http://www.wkadcenter.com>). Publication of an advertisement in ANESTHESIOLOGY does not constitute endorsement by the Society or Wolters Kluwer Health, Inc. of the product or service described therein or of any representations made by the advertiser with respect to the product or service.

14700 Citicorp Drive, Bldg 3, Hagerstown, MD 21742; phone: 800-638-3030; fax: 301-223-2400. Institutions that wish to purchase an online subscription or online with print, please contact the Ovid Regional Sales Office near you or visit [www.ovid.com/site/index.jsp](http://www.ovid.com/site/index.jsp) and select Contact and Locations.

**Address for non-member subscription information, orders, or change of address:** Wolters Kluwer Health, Inc., 14700 Citicorp Drive, Bldg 3, Hagerstown, MD 21742; phone: 800-638-3030; fax: 301-223-2400.

**Address for member subscription information, orders, or change of address:** Members of the American Society of Anesthesiologists receive the print and online journal with their membership. To become a member or provide a change of address, please contact the American Society of Anesthesiologists, 1061 American Lane, Schaumburg, Illinois 60173-4973; phone: 847-825-5586; fax: 847-825-1692; e-mail: [membership@ASAhq.org](mailto:membership@ASAhq.org). For all other membership inquiries, contact Wolters Kluwer Health, Inc., Customer Service Department, P.O. Box 1610, Hagerstown, MD 21740; phone: 800-638-3030; fax: 301-223-2400.

**Postmaster:** Send address changes to ANESTHESIOLOGY, P.O. BOX 1610, Hagerstown, MD 21740.

**Advertising:** Please contact Hilary Druker, National Account Manager, Health Learning, Research & Practice, Medical Journals, Wolters Kluwer Health, Inc.; phone: 609-304-9187; e-mail: [Hilary.Druker@wolterskluwer.com](mailto:Hilary.Druker@wolterskluwer.com). For classified advertising: Dave Wiegand, Recruitment Advertising Representative, Wolters Kluwer Health, Inc.; phone: 847-361-6128; e-mail: [Dave.Wiegand@wolterskluwer.com](mailto:Dave.Wiegand@wolterskluwer.com).
